# Supplementary material
Source: MDPI journal article supplement (https://www.mdpi.com/1996-1073/15/19/6885)
Supplement: s1 [file s1 › energies-1871434-Supplementary.pdf]

## Supplementary Materials

**Proof of Proposition 1.** According to the inverse induction method, the optimal decision of the EV manufacturer is first found by taking the partial derivatives of  $p_n$ ,  $\tau$  in the equation (1), respectively.

$$\frac{\partial \Pi_m^R}{\partial p_n} = a + \tau Q - \beta \tau Q + c_1 - 2p_n \quad (S1)$$

$$\frac{\partial \Pi_m^R}{\partial \tau} = ((1 - \beta) \cdot p_n - c_1 + p_r + s) \cdot Q - 2b\tau \quad (S2)$$

When  $4b - Q^2(1 - \beta)^2 > 0$ , the Hessian matrix  $\begin{bmatrix} -2 & (1 - \beta) \cdot Q \\ (1 - \beta) \cdot Q & -2b \end{bmatrix}$  of equation (1) with respect to  $p_n$  and  $\tau$  are negative definite and there exist a unique optimal solution. By setting equation (S1) and (S2) to zero. The reaction function of  $p_n$  and  $\tau$  are obtained by the joint solution:

$$p_n = \frac{2b \cdot (a + c_1) + Q^2 \cdot (1 - \beta) \cdot (s - c_1 + p_r)}{4b - Q^2 \cdot (1 - \beta)^2} \quad (S3)$$

$$\tau = \frac{Q \cdot (a + 2s - a \cdot \beta - (1 + \beta)c_1 + 2 \cdot p_r)}{4b - Q^2 \cdot (1 - \beta)^2} \quad (S4)$$

Substituting the resulting  $p_n$  and  $\tau$  into equation (2) and taking the partial derivative of  $p_r$ .

$$\frac{\partial \Pi_r^R}{\partial p_r} = \frac{Q^2 \cdot (2(f - c_2) - a \cdot (1 - \beta) + (1 + \beta) \cdot c_1 - 2s - 4 \cdot p_r)}{4b - Q^2 \cdot (1 - \beta)^2} \quad (S5)$$

Since  $\frac{\partial \Pi_r^R}{\partial p_r^2} = -\frac{4Q^2}{4b - Q^2 \cdot (1 - \beta)^2} < 0$ ,  $\Pi_r^R$  is concave in  $p_r$ . By setting  $\frac{\partial \Pi_r^R}{\partial p_r}$  to zero, then  $p_r$  in the equilibrium state can be solved jointly.

$$p_r^R = \frac{2 \cdot (f - c_2) + a \cdot (1 - \beta) - (1 + \beta) \cdot c_1 + 2(1 + \beta) \cdot c_1 - 2a \cdot (1 - \beta) - 2s}{4} \quad (S6)$$

Substituting the optimal  $p_r$  into equation (S3) and (S4), the optimal solution of  $p_n$  and  $\tau$  are found as

$$p_n^R = \frac{1}{4} \cdot \left( 2 \cdot (a + c_1) + Q^2 \cdot (1 - \beta) \cdot \frac{2(f - c_2) + a(1 - \beta) - (1 + \beta)c_1 + 2s}{4b - Q^2(1 - \beta)^2} \right) \quad (S7)$$

$$\tau^R = \frac{Q}{2} \cdot \frac{(2 \cdot (f - c_2) + a \cdot (1 - \beta) - (1 + \beta) \cdot c_1) + 2s}{4b - Q^2 \cdot (1 - \beta)^2} \quad (S8)$$

Let  $\psi = 2(f - c_2) + a \cdot (1 - \beta) - (1 + \beta) \cdot c_1$ , substituting  $\psi$  into equation (S6) -(S8), then equation (S6) - (S8) can be simplified as follows:

$$\begin{cases} p_n^R = \frac{1}{4} \cdot \left( 2(a + c_1) + Q^2 \cdot (1 - \beta) \cdot \frac{\psi + 2s}{4b - Q^2(1 - \beta)^2} \right) \\ \tau^R = \frac{(\psi + 2s) \cdot Q}{2 \cdot (4b - Q^2(1 - \beta)^2)} \\ p_r^R = \frac{\psi + 2(1 + \beta) \cdot c_1 - 2a \cdot (1 - \beta) - 2s}{4} \end{cases}$$

**Proof of Proposition 2.** Find the partial derivatives of  $s$  in the equations (7)-(9), respectively,  $\frac{\partial p_n^R}{\partial s} = \frac{Q^2 \cdot (1 - \beta)}{2 \cdot (4b - Q^2 \cdot (1 - \beta)^2)}$ ,  $\frac{\partial \tau^R}{\partial s} = \frac{Q}{4b - Q^2 \cdot (1 - \beta)^2}$ , and  $\frac{\partial p_r^R}{\partial s} = -\frac{1}{2} < 0$ . Based on  $4b - Q^2 \cdot (1 - \beta)^2 > 0$  and  $\beta < 1$ , we have  $\frac{\partial p_n^R}{\partial s} > 0$ ,  $\frac{\partial \tau^R}{\partial s} > 0$ .

**Proof of Proposition 3.** The partial derivatives of  $\beta$  in the equations (8) and (9) respectively, are obtained as  $\frac{\partial \tau^R}{\partial \beta} = -\frac{Q \cdot ((8b - 2Q^2 \cdot (1 - \beta)^2) \cdot (a + c_1) + 4Q^2 \cdot (1 - \beta) \cdot (\psi + 2s))}{(8b - 2Q^2 \cdot (1 - \beta)^2)^2}$ ,  $\frac{\partial p_r^R}{\partial \beta} = \frac{a + c_1}{4}$ . It is easy to know  $\frac{\partial p_r^R}{\partial \beta} > 0$ . From equation (8), we have  $\tau^R = \frac{(\psi + 2s) \cdot Q}{2 \cdot (4b - Q^2 \cdot (1 - \beta)^2)} > 0$ , then  $\psi + 2s > 0$ ; based on  $4b - Q^2 \cdot (1 - \beta)^2 > 0$ ,  $\beta < 1$ ,  $k > 0$ , we have  $\frac{\partial \tau^R}{\partial \beta} < 0$ . The partial derivatives of  $\beta$  in the equation (7) (10) and (11), are obtained as

$$\begin{cases} \frac{\partial p_n^R}{\partial \beta} = -\frac{Q^2(4b(a(1 - \beta) + f - \beta c_1 - c_2 + s) + Q^2(1 - \beta)^2(f - c_1 - c_2 + s))}{2(4b - Q^2(1 - \beta)^2)^2} \\ \frac{\partial \Pi_m^R}{\partial \beta} = -\frac{Q^2 \cdot (\psi + 2s) \cdot (2b \cdot (a + c_1) + Q^2 \cdot (1 - \beta) \cdot (f + s - c_1 - c_2))}{4 \cdot (4b - Q^2 \cdot (1 - \beta)^2)^2} \\ \frac{\partial \Pi_r^R}{\partial \beta} = -\frac{Q^2 \cdot (\psi + 2s) \cdot (2b \cdot (a + c_1) + Q^2 \cdot (1 - \beta) \cdot (f + s - c_1 - c_2))}{2 \cdot (4b - Q^2 \cdot (1 - \beta)^2)^2} \end{cases}$$

Where  $\psi = 2(f - c_2) + a \cdot (1 - \beta) - (1 + \beta) \cdot c_1$ . By setting  $\frac{\partial p_n^R}{\partial \beta}$ ,  $\frac{\partial \Pi_m^R}{\partial \beta}$  and  $\frac{\partial \Pi_r^R}{\partial \beta}$  to zero, from equation (8), we have  $\tau^R = \frac{(\psi + 2s) \cdot Q}{2 \cdot (4b - Q^2 \cdot (1 - \beta)^2)} > 0$ , then  $\psi + 2s > 0$ . Based on  $4b - Q^2 \cdot (1 - \beta)^2 > 0$ ,  $\beta < 1$ , and  $k > 0$ , when  $\beta \in [0, \min(1, \Gamma_1, \Gamma_2)]$ , we have  $\frac{\partial p_n^R}{\partial \beta} < 0$ ,  $\frac{\partial \Pi_m^R}{\partial \beta} < 0$ , and  $\frac{\partial \Pi_r^R}{\partial \beta} < 0$ , where  $\Gamma_1 = 1 + 2 \cdot \frac{f + s - c_1 - c_2}{a + c_1}$  and  $\Gamma_2 = \frac{1}{Q^2(f + s - c_1 - c_2)} (2b(a + c_1) + Q^2(f + s - c_1 - c_2) + 2\sqrt{b^2(a + c_1)^2 - bQ^2(f + s - c_1 - c_2)^2}) = 1 + 2 \cdot \frac{b \cdot (a + c_1) + \sqrt{b^2(a + c_1)^2 - bQ^2(f + s - c_1 - c_2)^2}}{Q^2 \cdot (f + s - c_1 - c_2)}$ .

**Proof of Proposition 4.** According to the inverse induction method, the optimal decision of the EV manufacturer is first found by taking the partial derivatives of  $p_n$ ,  $\tau$  in equation (4), respectively.

$$\frac{\partial \Pi_m^D}{\partial p_n} = a + t + Q \cdot (1 - \beta)\tau + c_1 - 2p_n \quad (S9)$$

$$\frac{\partial \Pi_m^D}{\partial \tau} = -2b\tau + Q \cdot (kt - c_1 + (1 - \beta)p_n + p_r) \quad (S10)$$

When  $4b - Q^2(1 - \beta)^2 > 0$ , the Hessian matrix  $\begin{bmatrix} -2 & (1 - \beta) \cdot Q \\ (1 - \beta) \cdot Q & -2b \end{bmatrix}$  of equation (4) with respect to  $p_n$  and  $\tau$  are negative definite and there exist a unique optimal solution. By setting equation (S9) and (S10) to zero. The reaction function of  $p_n$  and  $\tau$  are obtained by the joint solution:

$$p_n = -\frac{-2b(a+t+c_1)+Q^2(-1+\beta)(kt-c_1+p_r)}{4b-Q^2(-1+\beta)^2} \quad (S11)$$

$$\tau = \frac{Q(a+t+2kt-a\beta-t\beta-(1+\beta)c_1+2p_r)}{4b-Q^2(-1+\beta)^2} \quad (S12)$$

Substituting the resulting  $p_n$  and  $\tau$  into equation (5) and taking the partial derivative of  $p_r$ .

$$\frac{\partial \pi_r^D}{\partial p_r} = \frac{Q^2(a-2f+t+2kt-a\beta-t\beta-(1+\beta)c_1+2c_2+4p_r)}{-4b+Q^2(1-\beta)^2} \quad (S13)$$

Since  $\frac{\partial \Pi_r^D}{\partial p_r^2} = -\frac{4Q^2}{4b-Q^2(1-\beta)^2} < 0$ ,  $\Pi_r^D$  is concave in  $p_r$ . By setting  $\frac{\partial \Pi_r^D}{\partial p_r}$  to zero, then  $p_r$  in the equilibrium state can be solved jointly.

$$p_r^D = \frac{2(f-c_2)-a \cdot (1-\beta)+(1+\beta) \cdot c_1-(1-\beta+2k) \cdot t}{4} \quad (S14)$$

Substituting the optimal  $p_r$  into equation (S11) and (S12), the optimal solution of  $p_n$  and  $\tau$  are found as

$$p_n^D = \frac{1}{4} \cdot \left( 2 \cdot (a + c_1 + t) + Q^2 \cdot (1 - \beta) \cdot \frac{2(f - c_2) + a \cdot (1 - \beta) - (1 + \beta) \cdot c_1 + (1 - \beta + 2k) \cdot t}{4b - Q^2(1 - \beta)^2} \right) \quad (S15)$$

$$\tau^D = \frac{Q}{2} \cdot \frac{2(f - c_2) + a \cdot (1 - \beta) - (1 + \beta) \cdot c_1 + (1 - \beta + 2k) \cdot t}{4b - Q^2(1 - \beta)^2} \quad (S16)$$

Let  $\psi = 2(f - c_2) + a \cdot (1 - \beta) - (1 + \beta) \cdot c_1$ , substituting  $\psi$  into equation (S14) -(S16), then equation (S14) - (S16) can be simplified as follows:

$$\begin{cases} p_n^D = \frac{1}{4} \cdot \left( 2 \cdot (a + c_1 + t) + Q^2 \cdot (1 - \beta) \cdot \frac{\psi + (1 - \beta + 2k) \cdot t}{4b - Q^2(1 - \beta)^2} \right) \\ \tau^D = \frac{Q}{2} \cdot \frac{\psi + (1 - \beta + 2k) \cdot t}{4b - Q^2(1 - \beta)^2} \\ p_r^D = \frac{\psi + 2(1 + \beta)c_1 - 2a \cdot (1 - \beta) - (1 - \beta + 2k) \cdot t}{4} \end{cases}$$

**Proof of Proposition 5.** Find the partial derivatives of  $t$  in the equations (13)-(15), respectively,  $\frac{\partial p_n^D}{\partial t} = \frac{8b - Q^2 \cdot (1 - \beta) \cdot (1 - \beta - 2k)}{4 \cdot (4b - Q^2 \cdot (1 - \beta)^2)}$ ,  $\frac{\partial \tau^D}{\partial t} = \frac{Q \cdot (1 - \beta + 2k)}{2 \cdot (4b - Q^2 \cdot (1 - \beta)^2)}$ ,  $\frac{\partial p_r^D}{\partial t} = -\frac{1 - \beta + 2k}{4}$ . Based on  $4b -$

$Q^2 \cdot (1 - \beta)^2 > 0$ ,  $\beta < 1$ , and  $k > 0$ , we have  $\frac{\partial p_n^D}{\partial t} > 0$ ,  $\frac{\partial \tau^D}{\partial t} > 0$ ,  $\frac{\partial p_r^D}{\partial t} < 0$ .

**Proof of Proposition 6.** The partial derivatives of  $\beta$  in the equation (13) (16) and (17) respectively, are obtained as

$$\begin{cases} \frac{\partial p_n^D}{\partial \beta} = -\frac{Q^2 \cdot (4b \cdot (a(1 - \beta) + f + t + k \cdot t - \beta \cdot t - \beta \cdot c_1 - c_2) + Q^2(1 - \beta)^2(f + k \cdot t - c_1 - c_2))}{2 \cdot (4b - Q^2 \cdot (1 - \beta)^2)^2} \\ \frac{\partial \Pi_m^{D*}}{\partial \beta} = -\frac{Q^2 \cdot (\psi + (1 - \beta + 2k)) \cdot (2b \cdot (a + c_1 + t) + Q^2 \cdot (1 - \beta) \cdot (f + k \cdot t - c_1 - c_2))}{4 \cdot (4b - Q^2 \cdot (1 - \beta)^2)^2} \\ \frac{\partial \Pi_r^{D*}}{\partial \beta} = -\frac{Q^2 \cdot (\psi + (1 - \beta + 2k)) \cdot (2b \cdot (a + c_1 + t) + Q^2 \cdot (1 - \beta) \cdot (f + k \cdot t - c_1 - c_2))}{4 \cdot (4b - Q^2 \cdot (1 - \beta)^2)^2} \end{cases}$$

where  $\psi = 2(f - c_2) + a \cdot (1 - \beta) - (1 + \beta) \cdot c_1$ . By setting  $\frac{\partial p_n^D}{\partial \beta}$ ,  $\frac{\partial \Pi_m^{D*}}{\partial \beta}$  and  $\frac{\partial \Pi_r^{D*}}{\partial \beta}$  to zero,

from equation (14), we have  $\tau^D = \frac{Q}{2} \cdot \frac{\psi + (1 - \beta + 2k) \cdot t}{4b - Q^2(1 - \beta)^2} > 0$ , then  $\psi + (1 - \beta + 2k) \cdot t > 0$ . Based on

$4b - Q^2 \cdot (1 - \beta)^2 > 0$ ,  $\beta < 1$ , and  $k > 0$ , when  $\beta \in [0, \min(\Gamma_3, \Gamma_4)]$ , we have  $\frac{\partial p_n^D}{\partial \beta} < 0$ ,

$\frac{\partial \Pi_m^{D*}}{\partial \beta} < 0$ , and  $\frac{\partial \Pi_r^{D*}}{\partial \beta} < 0$ , where  $\Gamma_3 = 1 + 2 \cdot \frac{f + k \cdot t - c_1 - c_2}{a + t + c_1}$  and  $\Gamma_4 =$

$$\frac{2b \cdot (a + c_1 + t) + Q^2(f + k \cdot t - c_1 - c_2) + 2\sqrt{b^2(a + c_1 + t)^2 - bQ^2(f + k \cdot t - c_1 - c_2)^2}}{Q^2(f + k \cdot t - c_1 - c_2)} = 1 + 2 \cdot$$

$$\frac{b \cdot (a + c_1 + t) + \sqrt{b^2 \cdot (a + c_1 + t)^2 - bQ^2 \cdot (f + k \cdot t - c_1 - c_2)^2}}{Q^2 \cdot (f + k \cdot t - c_1 - c_2)}.$$

**Proof of Proposition 7.** From  $q^R - q^D = \frac{8bt + Q^2(2s(1 + \beta) - t(3 - 4\beta + \beta^2 + 2k(1 + \beta)))}{16b - 4Q^2(1 - \beta)^2}$ , based on  $4b -$

$Q^2 \cdot (1 - \beta)^2 > 0$ ,  $\beta < 1$ , and  $k > 0$ , when  $0 < s < \chi_1 \cdot t$ , we have  $q^R < q^D$ ; when  $s = \chi_1 \cdot$

$t$ , we have  $q^R = q^D$ ; when  $s > \chi_1 \cdot t$ , we have  $q^R > q^D$ , where  $\chi_1 = k + \frac{Q^2 \cdot (3 - 4\beta + \beta^2) - 8b}{2Q^2(1 + \beta)}$

**Proof of Proposition 8.** From  $\tau^R - \tau^D = \frac{Q(2s - (1 - \beta + 2k) \cdot t)}{2 \cdot (4b - Q^2(1 - \beta)^2)}$ ,  $p_r^R - p_r^D = \frac{(1 - \beta + 2k) \cdot t - 2s}{4}$ ,  $\Pi_r^{R*} -$

$\Pi_r^{D*} = \frac{Q^2 \cdot (2s - (1 - \beta + 2k) \cdot t)(2s + (1 - \beta + 2k) \cdot t + 2\psi)}{8 \cdot (4b - Q^2(1 - \beta)^2)}$ , based on  $4b - Q^2 \cdot (1 - \beta)^2 > 0$ ,  $\beta < 1$ , and  $k > 0$ ,

when  $0 < s < \chi_2 \cdot t$ , we have  $\tau^R < \tau^D$ ;  $p_r^R > p_r^D$ ; when  $s = \chi_2 \cdot t$ , we have  $\tau^R = \tau^D$ ;  $p_r^R = p_r^D$ ; when  $s > \chi_2 \cdot t$ , we have  $\tau^R > \tau^D$ ;  $p_r^R < p_r^D$ . It follows from equation (14) that  $\tau^D = \frac{Q}{2} \cdot$

$\frac{\psi + (1 - \beta + 2k) \cdot t}{4b - Q^2(1 - \beta)^2} > 0$ , then  $\psi + (1 - \beta + 2k) \cdot t > 0$ . Thus, we have  $2s + (1 - \beta + 2k) \cdot t + 2\psi > 0$ .

Therefore, when  $0 < s < \chi_2 \cdot t$ , we have  $\Pi_r^{R*} < \Pi_r^{D*}$ ; when  $s = \chi_2 \cdot t$ , we have  $\Pi_r^{R*} = \Pi_r^{D*}$ ; when  $s > \chi_2 \cdot t$ , we have  $\Pi_r^{R*} > \Pi_r^{D*}$ , where  $\chi_2 = k + \frac{1 - \beta}{2}$ .

**Proof of Proposition 9.** When  $s = t$ , we have  $\tau^R - \tau^D = \frac{Q \cdot (2s - (1 - \beta + 2k) \cdot t)}{2 \cdot (4b - Q^2(1 - \beta)^2)}$ . Based on  $4b - Q^2 \cdot (1 - \beta)^2 > 0$ ,  $\beta < 1$ , and  $k > 0$ , when  $k > \frac{1 + \beta}{2}$ , we have  $\tau^R > \tau^D$ ; when  $k = \frac{1 + \beta}{2}$ , we have  $\tau^R = \tau^D$ ; when  $0 < k < \frac{1 + \beta}{2}$ , we have  $\tau^R < \tau^D$ .

Proof of Proposition 10.  $\Pi_{gov}^{R*} - \Pi_{gov}^{D*} = \frac{t^2 \cdot (16b + Q^2 \cdot (4k \cdot (1 - \beta + k) - 3 \cdot (1 - \beta)^2)) - 2Q^2 \cdot (4e_b + 4e_p + \psi) \cdot (1 - \beta + 2k) \cdot t + 4Q^2 \cdot s \cdot (4e_b + 4e_p + \psi - s)}{16 \cdot (4b - Q^2 \cdot (-1 + \beta)^2)}$ . To simplify the equation, let  $A = 4e_p + 4e_b + \psi$  and  $L = 16b + Q^2 \cdot (4k \cdot (1 - \beta + k) - 3 \cdot (1 - \beta)^2)$ , based on  $4b - Q^2 \cdot (1 - \beta)^2 > 0$ , we have  $16b - 3Q^2 \cdot (1 - \beta)^2 > 0$ , then we have  $L > 0$ ; and  $\Pi_{gov}^{R*} - \Pi_{gov}^{D*} = \frac{Lt^2 - 2Q^2 \cdot A \cdot (1 - \beta + 2k) \cdot t + 4Q^2 \cdot s \cdot (A - s)}{16(4b - Q^2 \cdot (-1 + \beta)^2)}$ . According to  $\Pi_{gov}^{R*} - \Pi_{gov}^{D*} = \frac{Lt^2 - 2Q^2 \cdot A \cdot (1 - \beta + 2k) \cdot t + 4Q^2 \cdot s \cdot (A - s)}{16(4b - Q^2(1 - \beta)^2)}$ ,  $t_1$  and  $t_2$  can be solved as follows:

$$\begin{cases} t_1 = \frac{Q^2 \cdot A \cdot (1 + 2k - \beta) - \sqrt{Q^4 \cdot A \cdot (1 + 2k - \beta)^2 - 4 \cdot L^2 \cdot Q^2 \cdot s \cdot (A - s)}}{L^2} \\ t_2 = \frac{Q^2 \cdot A \cdot (1 + 2k - \beta) + \sqrt{Q^4 \cdot A \cdot (1 + 2k - \beta)^2 - 4 \cdot L^2 \cdot Q^2 \cdot s \cdot (A - s)}}{L^2} \end{cases}$$

Therefore, when  $0 < t < t_1$  or  $t > t_2$ , we have  $\Pi_{gov}^{R*} > \Pi_{gov}^{D*}$ ; when  $t_1 < t < t_2$ , we have  $\Pi_{gov}^{R*} < \Pi_{gov}^{D*}$ .
